# Supplementary material
Source: publisher figshare collection journal article supplement (https://acs.figshare.com/ndownloader/files/3732673)
Supplement: Supplementary file 1 [file 3732673]

## Supporting Information

# **Monohydroxylated Polybrominated Diphenyl Ethers (OH-PBDEs) and Dihydroxylated Polybrominated Biphenyls (di-OH-PBBs): Novel Photoproducts of 2,6-Dibromophenol**

*Hongxia Zhao,\*<sup>1</sup> Jingqiu Jiang,<sup>1</sup> Yanli Wang,<sup>1</sup> Hans-Joachim Lehmler,<sup>2</sup>*

*Garry R. Buettner,<sup>3</sup> Xie Quan,<sup>1</sup> Jingwen Chen<sup>1</sup>*

<sup>1</sup> Key Laboratory of Industrial Ecology and Environmental Engineering (Ministry of Education), School of Environmental Science and Technology, Dalian University of Technology Linggong Road 2; Dalian 116024, China

<sup>2</sup> Department of Occupational and Environmental Health, College of Public Health, The University of Iowa, IA 52242, USA

<sup>3</sup> Free Radical and Radiation Biology Program & ESR Facility, Carver College of Medicine, The University of Iowa, IA 52242, USA

## **Summary**

**Number of pages: 10**

**Text S1**

**9 Figures**

**1 Table**

## 1    **Text S1. Instrument Conditions**

### 2    *S1.1. HPLC-LTQ Orbitrap condition*

3            The LTQ Orbitrap, a hybrid instrument with a linear ion trap (LIT) mass spectrometer  
4    linked to a high-resolution Fourier transform (FT) mass spectrometer, was exploited to  
5    perform high-resolution full-scan MS analysis.

6            Chromatographic separations were performed using an Accela HPLC system. The  
7    HPLC conditions were as follows: Column: Thermo C18, 150 × 2.1 mm, 5 µm particle size  
8    (Thermo Fisher Scientific, Bellefonte, PA). Mobile phase: (A) water, (B) acetonitrile. Flow  
9    rate: 0.2 mL/min. Injection volume: 5 µL. Gradient: Linear gradient of 35%-85% A over 20  
10   minutes, 85%-85% A over 10 min, post time: 5 min.

11           The MS conditions were as follows: ion source: ESI; negative electrospray ion source  
12   voltage: 2.98 kV; full scan MS in the Orbitrap with a mass resolution of 30000, scan range:  
13   *m/z* 150-700, capillary voltage: 10 V, tube lens: 100 V, sheath gas flow: 30 arb, aux gas flow:  
14   10 arb.

### 15   *S1.2. GC-MS*

16           The derivatized extracts were analyzed by an Agilent HP 6890 gas chromatograph  
17   coupled with a quadrupole mass selective detector HP 5975N operated in negative chemical  
18   ionization (NCI) mode. A DB-5MS column (15 m × 0.25 mm, 0.25 µm film thickness; J & W  
19   Scientific, Folsom, CA, USA) was used. The injector temperature was 280 °C. Auto injection  
20   of 1 µL of the samples was conducted in splitless mode and the split mode was turned on  
21   after 2 min. Methane was used as chemical ionization moderating gas and helium as carrier  
22   gas at a flow rate of 1.0 mL/min. The ion source and interface temperatures were set at

23 150 °C and 300 °C, respectively. The temperature of the GC oven was programmed as  
24 follows: the initial oven temperature was 90 °C held for 3 min, ramped to 210 °C at 30 °C  
25 /min with no hold time, then ramped to 236 °C at 2 °C/min with no hold time, then ramped to  
26 300 °C at 20 °C/min. MS Quad: 150 °C, MS source: 150 °C, solvent delay: 4.00 min, scan  
27 scope: 70-540.

28

29 **Figures S1-S9**

30

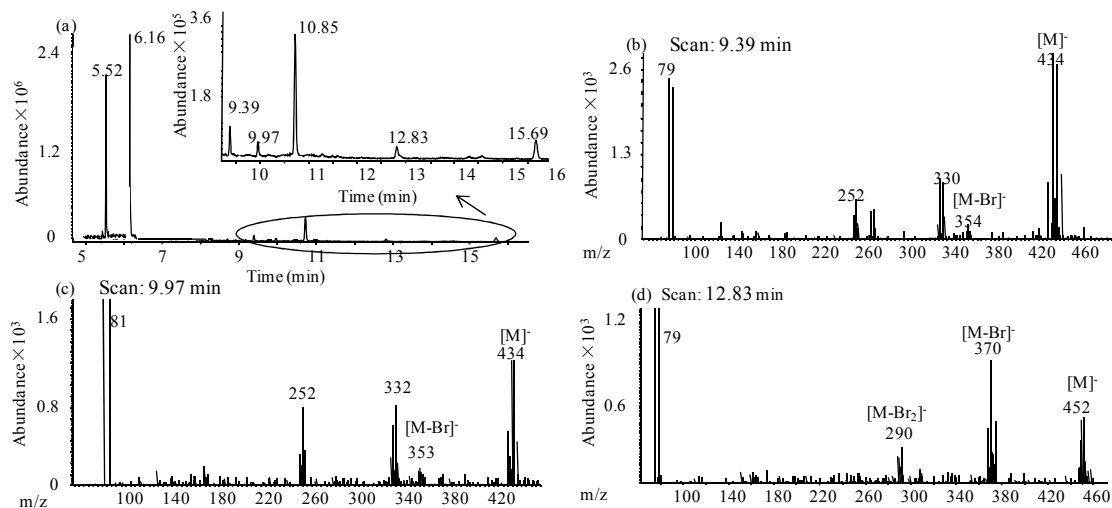

31

32

33

34 **Figure S1. (a)** The GC total ion chromatograph of 2,6-bromophenol(water solution, 80  
35  $\mu\text{mol/L}$ ) and MS spectrum **(b-d)** of three tribrominated photoproducts with retention time of  
36 9.39 min, 9.97 min, 12.83 min, respectively.

37

38

39

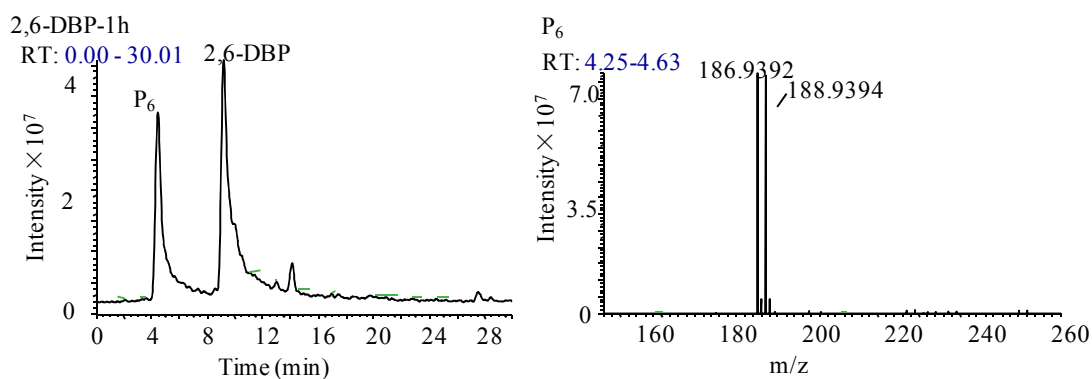

40

41 **Figure S2. The total ion chromatograph of 2,6-bromophenol (aqueous solution, 80  $\mu\text{mol/L}$ )**  
42 **and MS spectrum of monobromo-dihydroxybenzene with retention time of 4.43 min.**

43

44

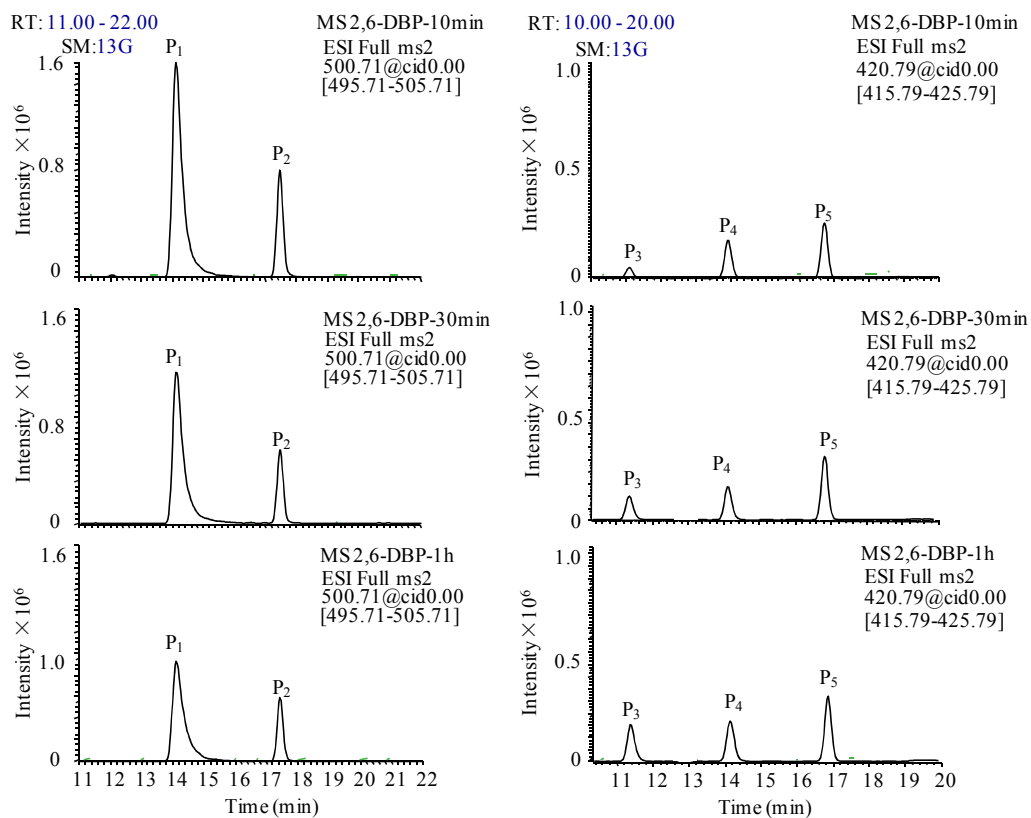46  
47

48 **Figure S3.** The LTQ-Orbitrap spectra of two tetrabrominated products P<sub>1</sub>, P<sub>2</sub> and three  
 49 tribrominated products P<sub>3</sub>-P<sub>5</sub>, which extract m/z = 495.71-505.71 and m/z = 415.79-425.79,  
 50 respectively, with irradiation time of 10 min, 30 min and 1 h from 2,6-DBP.

51  
52

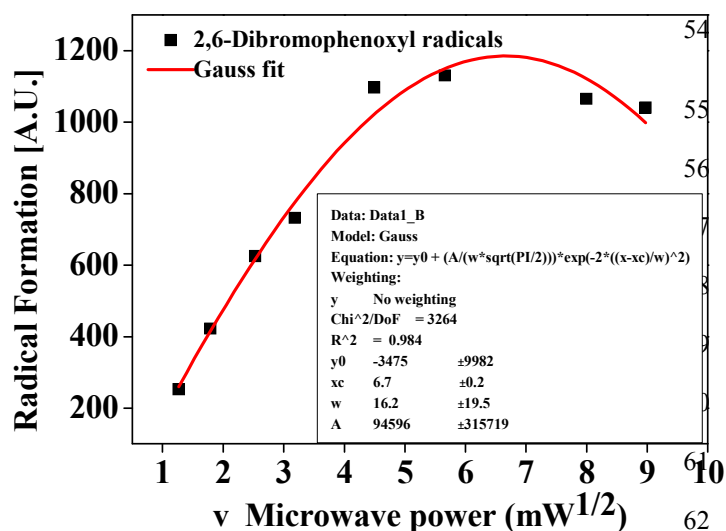

**Figure S4.** (Microwave power/mW)<sup>1/2</sup> dependence of the peak-to-peak intensity of radicals generated from irradiation of 2, 6-dibromophenol (phosphate buffer pH 7.4). (This plot is fitted using a Gaussian model.)

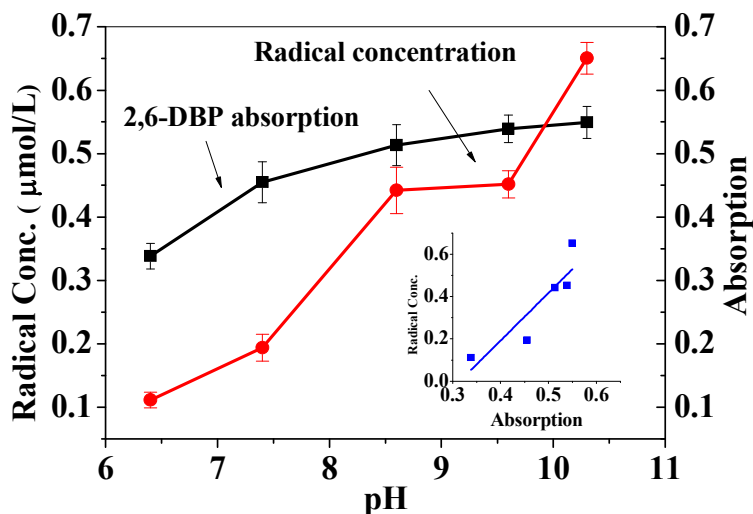

**Figure S5.** Effects of pH on the formation of radical and 2,6-DBP UV absorption, the inserted figure shows that the positive relationship of absorption and radical concentration. Error bars are standard deviations of triplicate measurements.

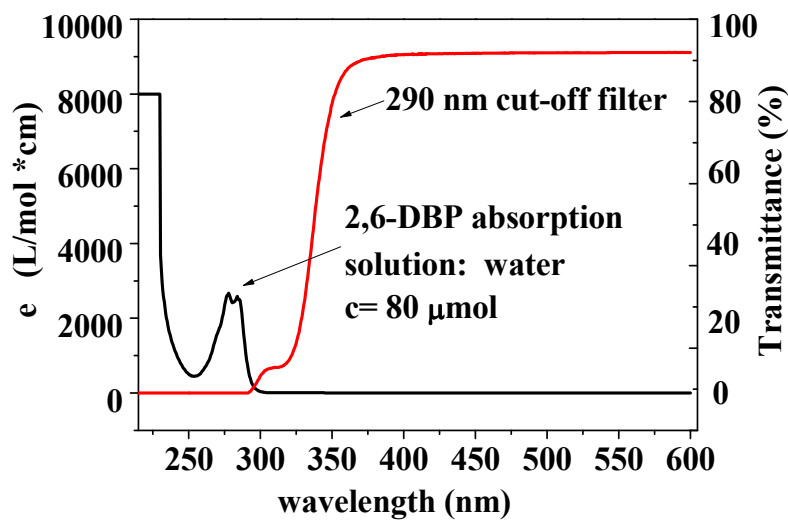

**Figure S6.** Absorption spectrum of 2,6-DBP in water (80  $\mu\text{mol/L}$ ); transmittance (%) of 290 nm cut-off filters.

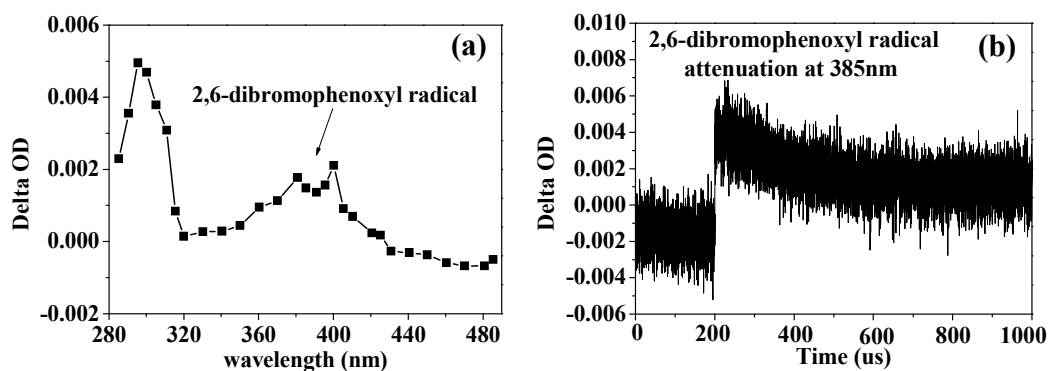

**Figure S7.** The transient absorption spectra of 2,6-DBP in aqueous solution (1 mmol/L) bubbled with  $\text{N}_2$ . **(a)** The generated transient absorption spectrum of 2,6- dibromophenoxy radical at laser pulse  $\lambda = 266 \text{ nm}$ ; **(b)** The decay curve of 2,6-dibromophenoxy radical at 385nm (half-life time<sub>2,6-dibromophenoxy radical</sub> was determined to be 122  $\mu\text{s}$ ).

90

91

92

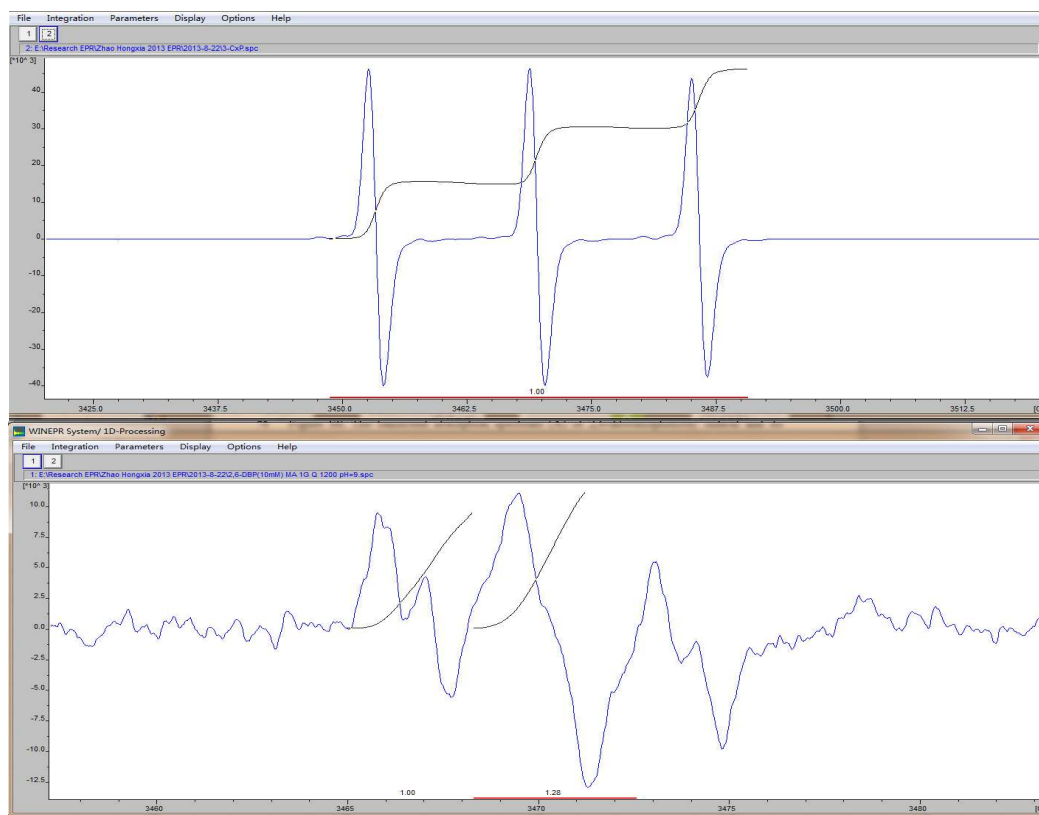

93

94

95

96

97

98

**Figure S8.** Quantification of the formed 2,6-dibromophenoxy radical using 3-carboxy-PROXYL as a standard.  
(a) Example double integration of a spectrum of the 3-carboxy-PROXYL standard solution;  
(b) Example integration of a spectrum of 2,6-dibromophenoxy radical.



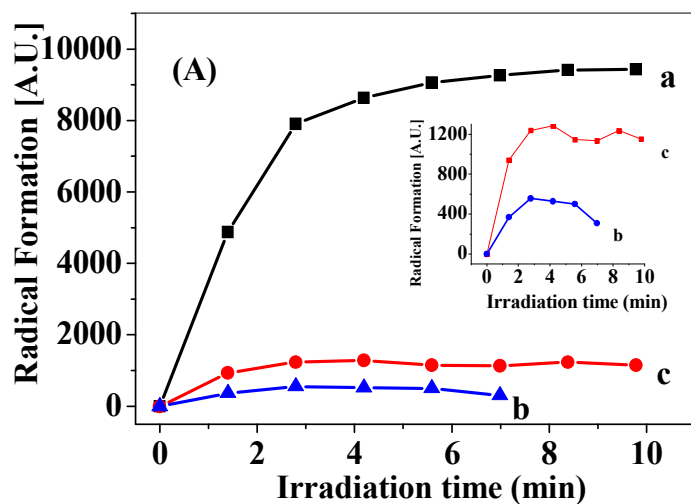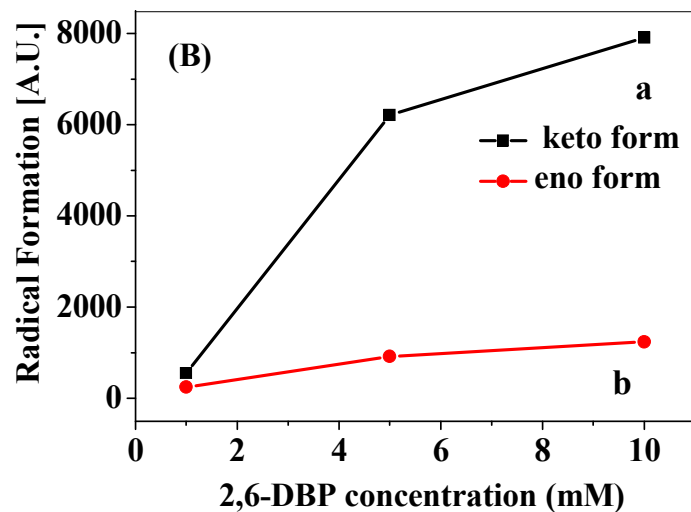

**Figure S9.** Free radical formation increases with time of light exposure and concentration of 2,6-DBP.

(A) Radical formation (A.U., derived from signal heights, peak-to-peak) correlated to irradiation time with: (a) 2,6-DBP (10 mM) + DMPO (50 mM) in water (pH = 7.4); (b) 2,6-DBP (1 mM) + DMPO (50 mM) in water (pH = 7.4); (c) 2,6-DBP (10 mM) in water (pH = 7.4).

(B) Concentration of 2,6-DBP in: (a) water (pH = 7.4) added DMPO (50 mM); (b) water (pH = 7.4) with 5.6 min irradiation time.

112

113 **Table S1.** The apparent yield (%) of six products from irradiation of 2,6-DBP with different  
 114 times of UV-exposure.

| Reaction<br>Time<br>(min) | tribrominated<br>product 1 | tribrominated<br>product 2 | tribrominated<br>product 3 | 4'-OH-<br>BDE73 | 4'4-di-OH-<br>PBB80 | 1,2-di-<br>OH-6-<br>bromo-<br>benzene |
|---------------------------|----------------------------|----------------------------|----------------------------|-----------------|---------------------|---------------------------------------|
| 0                         | 0                          | 0                          | 0                          | 0               | 0                   | 0                                     |
| 10                        | 0.048                      | 0.17                       | 0.23                       | 2.59            | 0.91                | 1.79                                  |
| 20                        | 0.11                       | 0.15                       | 0.27                       | 2.65            | 0.92                | 5.43                                  |
| 30                        | 0.14                       | 0.19                       | 0.27                       | 1.85            | 0.60                | 15                                    |
| 60                        | 0.17                       | 0.19                       | 0.27                       | 1.32            | 0.50                | 22                                    |
| 120                       | 0.092                      | 0.16 <sup>1</sup>          | 0.26                       | 0.49            | 0.19                | 29                                    |

115

116

117
